# Supplementary material
Source: publisher site journal article supplement (https://www.dovepress.com/article/supplementary_file/607894/607894%20Revised%20Supplementary%20Tables_1.xlsx)
Supplement: Supplementary file 1 [file 607894%20Revised%20Supplementary%20Tables_1.xlsx]

## Sheet: Supplementary Table S1
Supplementary Table S1： 19 SNPs significantly associated with POI
pos.exposure	other_allele.exposure	effect_allele.exposure	SNP	pval.exposure	beta.exposure	se.exposure	eaf.exposure	exposure	R2	F
191166924	A	C	rs12467660	2.97941e-07	0.607034	0.118452	0.922167	POI	0.0385501927640591	26.1826209600072
212710861	T	C	rs17273207	9.35406e-06	0.376978	0.0850661	0.0925927	POI	0.029110357273905	19.5790154342215
190352155	A	T	rs6767446	7.0661e-06	-0.323079	0.0719281	0.202629	POI	0.0298815917879258	20.113709081634
11013532	G	A	rs567467801	8.34545e-06	0.996525	0.22363	0.00779516	POI	0.0294241844755456	19.7964879767264
161507203	T	G	rs2962422	5.99971e-06	0.590707	0.130503	0.0316295	POI	0.0303309137632297	20.4256142311964
10842705	G	A	rs112107905	1.57699e-06	0.724042	0.150804	0.0212371	POI	0.0339968772199947	22.9812516141444
23397306	G	C	rs117804920	6.93777e-08	1.21231	0.224802	0.00651195	POI	0.0425127063603166	28.9933844947017
134442603	G	T	rs2229543	5.63002e-06	-0.623142	0.137261	0.0606119	POI	0.0305058835701268	20.5471509663707
551791	C	G	rs61831033	2.29705e-07	0.812289	0.157009	0.0181235	POI	0.0392588124688682	26.6835698051513
127847431	G	A	rs673941	6.94976e-06	-0.346538	0.0770904	0.177822	POI	0.0299270711518403	20.1452662794702
78002749	T	C	rs117059759	6.76753e-06	0.501997	0.111533	0.0464453	POI	0.0300003119210535	20.1960927670459
19705281	G	A	rs112885626	7.53009e-06	0.636059	0.142037	0.0262553	POI	0.0297066432245134	19.9923434393829
108294284	A	G	rs78994892	9.90307e-06	1.11386	0.252046	0.00563044	POI	0.0289534517285362	19.4703374543572
80643714	C	T	rs113216930	6.94768e-06	0.603133	0.13417	0.0305056	POI	0.0299280211985034	20.1459255289155
25368679	A	G	rs555460025	1.09381e-06	1.4608	0.299715	0.00294466	POI	0.0349986415157168	23.6829852194817
22830716	G	T	rs8030551	3.97118e-06	-0.328248	0.0711588	0.231181	POI	0.0314645248969558	21.2138174448656
89095526	C	T	rs10163422	5.01834e-06	0.256526	0.0562061	0.349557	POI	0.0308218147142306	20.7667127819825
2736069	C	G	rs147896048	5.12035e-06	0.905656	0.198618	0.0105921	POI	0.0307663867944354	20.7281818366996
50823040	G	T	rs3212821	6.04519e-06	1.21254	0.267977	0.0046085	POI	0.0303101886379541	20.4112211437831

## Sheet: Supplementary Table S2a
Supplementary Table S2a: Forward MR Analysis
Exposure	Outcome	ID	method	nsnp	b	se	pval	lo_ci	up_ci	or	or_lci95	or_uci95
POI	Osteoporosis	GCST90468145	Inverse variance weighted	4	0.0235826	0.0296408	0.426258	-0.0345135	0.0816786	1.02386	0.966075	1.08511
			MR Egger	4	-0.0584389	0.0686927	0.484524	-0.193077	0.0761988	0.943236	0.824419	1.07918
			Weighted median	4	0.0342322	0.0379221	0.366686	-0.0400951	0.10856	1.03482	0.960698	1.11467
POI	Heel bone mineral density	GCST90029004	Inverse variance weighted	13	-0.0022566	0.0024374	0.354528	-0.0070339	0.0025206	0.997746	0.992991	1.00252
			MR Egger	13	0.000133	0.006342	0.983643	-0.0122973	0.0125634	1.00013	0.987778	1.01264
			Weighted median	13	-0.0022046	0.0030646	0.471904	-0.0082113	0.003802	0.997798	0.991822	1.00381
POI	Ultradistal forearm bone mineral density	GCST90013422	Inverse variance weighted	10	0.0112142	0.0118812	0.345238	-0.0120729	0.0345013	1.01128	0.988	1.0351
			MR Egger	10	0.0362507	0.0278542	0.229333	-0.0183436	0.090845	1.03692	0.981824	1.0951
			Weighted median	10	0.0096523	0.0165128	0.558861	-0.0227129	0.0420175	1.0097	0.977543	1.04291
POI	Bone mineral density	GCST90014022	Inverse variance weighted	15	-0.0049865	0.0021563	0.0207483	-0.0092129	-0.0007602	0.995026	0.990829	0.99924
			MR Egger	15	-0.0002616	0.0047952	0.957315	-0.0096603	0.009137	0.999738	0.990386	1.00918
			Weighted median	15	-0.0043244	0.0029325	0.140301	-0.010072	0.0014232	0.995685	0.989978	1.00142
POI	Total body bone mineral density	ebi-a-GCST005348	Inverse variance weighted	14	0.0025737	0.0085212	0.762622	-0.0141278	0.0192753	1.00258	0.985972	1.01946
			MR Egger	14	0.0116155	0.0222125	0.610546	-0.031921	0.0551519	1.01168	0.968583	1.0567
			Weighted median	14	0.0004607	0.0106636	0.965541	-0.02044	0.0213614	1.00046	0.979768	1.02159
POI	Total body bone mineral density (age 15-30)	ebi-a-GCST005344	Inverse variance weighted	9	0.039554	0.0325361	0.224101	-0.0242167	0.103325	1.04035	0.976074	1.10885
			MR Egger	9	0.135696	0.090383	0.176958	-0.0414543	0.312847	1.14533	0.959393	1.36731
			Weighted median	9	0.0515172	0.0442818	0.24467	-0.0352752	0.13831	1.05287	0.96534	1.14833
POI	Total body bone mineral density (age 0-15)	ebi-a-GCST005345	Inverse variance weighted	11	-0.0064198	0.0164446	0.696248	-0.0386512	0.0258116	0.993601	0.962086	1.02615
			MR Egger	11	-0.0113815	0.0424575	0.79469	-0.0945982	0.0718353	0.988683	0.909738	1.07448
			Weighted median	11	-0.0181762	0.0225165	0.41953	-0.0623085	0.0259562	0.981988	0.939593	1.0263
POI	Total body bone mineral density (age 30-45)	ebi-a-GCST005346	Inverse variance weighted	11	0.0270539	0.0186964	0.147893	-0.009591	0.0636988	1.02742	0.990455	1.06577
			MR Egger	11	-0.0212688	0.0493973	0.676912	-0.118087	0.0755499	0.978956	0.888618	1.07848
			Weighted median	11	0.0257822	0.0266612	0.333529	-0.0264738	0.0780382	1.02612	0.973874	1.08116
POI	Total body bone mineral density (age over 60)	ebi-a-GCST005349	Inverse variance weighted	14	-0.018415	0.0153824	0.231251	-0.0485646	0.0117346	0.981753	0.952596	1.0118
			MR Egger	14	-0.0178803	0.0407272	0.668443	-0.0977056	0.061945	0.982279	0.906916	1.0639
			Weighted median	14	-0.0121064	0.0183498	0.509409	-0.048072	0.0238592	0.987967	0.953065	1.02415
POI	Total body bone mineral density (age 45-60)	ebi-a-GCST005350	Inverse variance weighted	14	0.0056053	0.0129681	0.665571	-0.0198122	0.0310228	1.00562	0.980383	1.03151
			MR Egger	14	0.0432934	0.0320762	0.202022	-0.0195759	0.106163	1.04424	0.980614	1.112
			Weighted median	14	0.0099798	0.0189445	0.59834	-0.0271514	0.0471109	1.01003	0.973214	1.04824
POI	Fractured bones in last 5 years	GCST90043629	Inverse variance weighted	13	0.0130364	0.0082718	0.115024	-0.0031763	0.0292491	1.01312	0.996829	1.02968
			MR Egger	13	0.0190908	0.0222026	0.408224	-0.0244263	0.0626078	1.01927	0.97587	1.06461
			Weighted median	13	0.0133373	0.0104493	0.201819	-0.0071433	0.0338178	1.01343	0.992882	1.0344
POI	Fractured of heel	GCST90043721	Inverse variance weighted	13	-0.0340728	0.131771	0.795963	-0.292345	0.224199	0.966501	0.746511	1.25132
			MR Egger	13	-0.285536	0.346168	0.426984	-0.964026	0.392954	0.751611	0.381354	1.48135
			Weighted median	13	-0.202859	0.171848	0.23782	-0.539681	0.133963	0.816394	0.582934	1.14335
POI	Fractured of ankle	GCST90044352	Inverse variance weighted	13	0.0041861	0.0194247	0.829374	-0.0338863	0.0422585	1.00419	0.966681	1.04316
			MR Egger	13	0.0484911	0.0501544	0.354401	-0.0498114	0.146794	1.04969	0.951409	1.15812
			Weighted median	13	0.0003864	0.0263735	0.98831	-0.0513057	0.0520785	1.00039	0.949988	1.05346
POI	Fractured of leg	GCST90044353	Inverse variance weighted	13	-0.0230148	0.0284367	0.418322	-0.0787508	0.0327211	0.977248	0.92427	1.03326
			MR Egger	13	-0.0353958	0.0752128	0.647114	-0.182813	0.112021	0.965223	0.832924	1.11854
			Weighted median	13	-0.0026227	0.0385062	0.945696	-0.0780948	0.0728494	0.997381	0.924877	1.07557
POI	Fractured of hip	GCST90044354	Inverse variance weighted	13	-0.023832	0.0540989	0.659556	-0.129866	0.0822019	0.97645	0.878213	1.08567
			MR Egger	13	0.135214	0.139841	0.354367	-0.138875	0.409303	1.14478	0.870337	1.50577
			Weighted median	13	-0.0196625	0.076812	0.797965	-0.170214	0.130889	0.98053	0.843484	1.13984
POI	Fractured of spine	GCST90044355	Inverse variance weighted	13	-0.0266026	0.0545715	0.625917	-0.133563	0.0803575	0.973748	0.874973	1.08367
			MR Egger	13	0.0583549	0.144442	0.693954	-0.224751	0.34146	1.06009	0.798715	1.407
			Weighted median	13	-0.0047391	0.0687802	0.945068	-0.139548	0.13007	0.995272	0.869751	1.13891
POI	Fractured of wrist	GCST90044356	Inverse variance weighted	13	0.0139176	0.0165239	0.399637	-0.0184693	0.0463046	1.01401	0.9817	1.04739
			MR Egger	13	0.061449	0.0424735	0.175853	-0.0217991	0.144697	1.06338	0.978437	1.15569
			Weighted median	13	0.0268198	0.0247811	0.279134	-0.0217512	0.0753907	1.02718	0.978484	1.07831
POI	Fractured of arm	GCST90044357	Inverse variance weighted	13	0.0418066	0.0241784	0.083793	-0.005583	0.0891962	1.04269	0.994433	1.0933
			MR Egger	13	0.11662	0.0604864	0.0800532	-0.0019334	0.235173	1.12369	0.998068	1.26513
			Weighted median	13	0.045225	0.0323205	0.161734	-0.0181233	0.108573	1.04626	0.98204	1.11469
POI	Fracture of neck of femur	GCST90044632	Inverse variance weighted	13	0.017588	0.0351872	0.617187	-0.0513789	0.0865548	1.01774	0.949919	1.09041
			MR Egger	13	0.0174273	0.0909449	0.851528	-0.160825	0.195679	1.01758	0.851441	1.21614
			Weighted median	13	-0.0173853	0.0470646	0.711835	-0.109632	0.0748614	0.982765	0.896164	1.07773
POI	Fracture of patella	GCST90044635	Inverse variance weighted	13	0.0504788	0.0696577	0.468655	-0.0860502	0.187008	1.05177	0.917548	1.20564
			MR Egger	13	-0.239907	0.162313	0.167447	-0.55804	0.0782268	0.786701	0.57233	1.08137
			Weighted median	13	0.0704283	0.0821672	0.391371	-0.0906194	0.231476	1.07297	0.913365	1.26046
POI	Fracture of pelvis	GCST90044638	Inverse variance weighted	13	-0.0434975	0.0636668	0.494477	-0.168284	0.0812894	0.957435	0.845113	1.08468
			MR Egger	13	-0.162093	0.16457	0.34582	-0.484651	0.160465	0.850362	0.615912	1.17406
			Weighted median	13	-0.0141657	0.0859911	0.869153	-0.182708	0.154377	0.985934	0.833011	1.16693
POI	Fracture of humerus	GCST90044639	Inverse variance weighted	13	0.0086453	0.0379022	0.819573	-0.065643	0.0829335	1.00868	0.936465	1.08647
			MR Egger	13	0.0134724	0.0979215	0.893056	-0.178454	0.205399	1.01356	0.836563	1.22801
			Weighted median	13	0.031073	0.0476955	0.514733	-0.0624103	0.124556	1.03156	0.939497	1.13265
POI	Fracture of radius and ulna	GCST90044640	Inverse variance weighted	13	-0.0182911	0.0208034	0.379275	-0.0590658	0.0224837	0.981875	0.942645	1.02274
			MR Egger	13	-0.0380502	0.053757	0.493783	-0.143414	0.0673135	0.962665	0.866395	1.06963
			Weighted median	13	-0.0353264	0.0275591	0.199898	-0.0893422	0.0186894	0.96529	0.914533	1.01887
POI	Fracture of clavicle or scapula	GCST90044641	Inverse variance weighted	13	0.0342017	0.0487362	0.482821	-0.0613212	0.129725	1.03479	0.940521	1.13851
			MR Egger	13	0.107484	0.125612	0.410424	-0.138715	0.353683	1.11347	0.870476	1.4243
			Weighted median	13	0.0035774	0.0677602	0.957895	-0.129233	0.136387	1.00358	0.87877	1.14613
POI	Fracture of hand or wrist	GCST90044643	Inverse variance weighted	13	-0.0144773	0.0281216	0.606685	-0.0695955	0.040641	0.985627	0.932771	1.04148
			MR Egger	13	0.0486853	0.072939	0.518224	-0.0942751	0.191646	1.04989	0.910032	1.21124
			Weighted median	13	-0.0200278	0.0385769	0.603645	-0.0956386	0.0555829	0.980171	0.908792	1.05716
POI	Fracture of ribs	GCST90044645	Inverse variance weighted	13	-0.0133855	0.0635481	0.833172	-0.13794	0.111169	0.986704	0.871151	1.11758
			MR Egger	13	-0.0045554	0.171227	0.979252	-0.340161	0.33105	0.995455	0.711656	1.39243
			Weighted median	13	0.0105115	0.077008	0.891427	-0.140424	0.161447	1.01057	0.86899	1.17521
POI	Skull and face fracture and other intercranial injury	GCST90044649	Inverse variance weighted	13	-0.0181116	0.0337504	0.591521	-0.0842624	0.0480392	0.982051	0.91919	1.04921
			MR Egger	13	0.0086875	0.0870293	0.922281	-0.16189	0.179265	1.00873	0.850535	1.19634
			Weighted median	13	0.013307	0.0458205	0.771497	-0.0765011	0.103115	1.0134	0.926352	1.10862
POI	Malunion and nonunion of fracture	GCST90044575	Inverse variance weighted	13	0.0071527	0.044944	0.873553	-0.0809375	0.0952429	1.00718	0.922251	1.09993
			MR Egger	13	0.193678	0.115924	0.122948	-0.0335319	0.420889	1.21371	0.967024	1.52331
			Weighted median	13	-0.0102748	0.0605716	0.865301	-0.128995	0.108446	0.989778	0.878978	1.11454
POI	Compression fracture	ebi-a-GCST90018828	Inverse variance weighted	5	0.0298879	0.0301094	0.320884	-0.0291266	0.0889024	1.03034	0.971294	1.09297
			MR Egger	5	-0.0310688	0.0777619	0.716241	-0.183482	0.121344	0.969409	0.832367	1.12901
			Weighted median	5	0.0131558	0.0369611	0.721888	-0.0592879	0.0855996	1.01324	0.942435	1.08937

## Sheet: Supplementary Table S2b
Supplementary Table S2b: Outlier and pleiotropy analysis（Forward MR）
Exposure	Outcome	ID	Global.Test.Pvalue	egger_intercept	se	pval
POI	Osteoporosis	GCST90468145	0.572	0.0488874	0.0369353	0.316671
POI	Heel bone mineral density	GCST90029004	0.127	-0.0012362	0.0030092	0.689108
POI	Ultradistal forearm bone mineral density	GCST90013422	0.817	-0.0171974	0.0173051	0.349434
POI	Bone mineral density	GCST90014022	0.337	-0.0026877	0.002441	0.290832
POI	Total body bone mineral density	ebi-a-GCST005348	0.143	-0.0050849	0.0114703	0.66543
POI	Total body bone mineral density (age 15-30)	ebi-a-GCST005344	0.526	-0.050811	0.0445649	0.291725
POI	Total body bone mineral density (age 0-15)	ebi-a-GCST005345	0.742	0.0026921	0.0212383	0.90192
POI	Total body bone mineral density (age 30-45)	ebi-a-GCST005346	0.55	0.026176	0.0247675	0.318113
POI	Total body bone mineral density (age over 60)	ebi-a-GCST005349	0.124	-0.0003009	0.0210715	0.988843
POI	Total body bone mineral density (age 45-60)	ebi-a-GCST005350	0.525	-0.021607	0.0168197	0.223168
POI	Fractured bones in last 5 years	GCST90043629	0.384	-0.003916	0.0132382	0.772883
POI	Fractured of heel	GCST90043721	0.221	0.162439	0.206209	0.447491
POI	Fractured of ankle	GCST90044352	0.833	-0.0286409	0.0298917	0.358571
POI	Fractured of leg	GCST90044353	0.481	0.0080101	0.0448551	0.861515
POI	Fractured of hip	GCST90044354	0.805	-0.102769	0.0833238	0.243146
POI	Fractured of spine	GCST90044355	0.213	-0.0549382	0.0861061	0.536511
POI	Fractured of wrist	GCST90044356	0.399	-0.0307183	0.0253092	0.250271
POI	Fractured of arm	GCST90044357	0.312	-0.0483441	0.0360397	0.206824
POI	Fracture of neck of femur	GCST90044632	0.879	0.0001038	0.0541835	0.998505
POI	Fracture of patella	GCST90044635	0.175	0.187625	0.0967067	0.0784223
POI	Fracture of pelvis	GCST90044638	0.79	0.0766377	0.0980668	0.45101
POI	Fracture of humerus	GCST90044639	0.971	-0.0031185	0.0583294	0.958322
POI	Fracture of radius and ulna	GCST90044640	0.827	0.0127655	0.032024	0.6978
POI	Fracture of clavicle or scapula	GCST90044641	0.657	-0.0474243	0.074921	0.539676
POI	Fracture of hand or wrist	GCST90044643	0.425	-0.0408415	0.0434791	0.367727
POI	Fracture of ribs	GCST90044645	0.19	-0.0057106	0.10208	0.956391
POI	Skull and face fracture and other intercranial injury	GCST90044649	0.701	-0.0173322	0.0518809	0.744605
POI	Malunion and nonunion of fracture	GCST90044575	0.678	-0.12065	0.069118	0.108717
POI	Compression fracture	ebi-a-GCST90018828	0.689	0.0344573	0.040528	0.45768

## Sheet: Supplementary Table S2c
Supplementary Table S2c: Heterogeneity analysis（Forward MR）
Exposure	Outcome	ID	method	Q	Q_df	Q_pval
POI	Osteoporosis	GCST90468145	MR Egger	0.488371	2	0.783342
			Inverse variance weighted	2.24028	3	0.524058
POI	Heel bone mineral density	GCST90029004	MR Egger	16.9175	11	0.11034
			Inverse variance weighted	17.177	12	0.143059
POI	Ultradistal forearm bone mineral density	GCST90013422	MR Egger	4.4689	8	0.812537
			Inverse variance weighted	5.4565	9	0.792839
POI	Bone mineral density	GCST90014022	MR Egger	14.0028	13	0.373644
			Inverse variance weighted	15.3087	14	0.35738
POI	Total body bone mineral density	ebi-a-GCST005348	MR Egger	18.4514	12	0.102655
			Inverse variance weighted	18.7536	13	0.130943
POI	Total body bone mineral density (age 15-30)	ebi-a-GCST005344	MR Egger	6.3271	7	0.502117
			Inverse variance weighted	7.62706	8	0.470721
POI	Total body bone mineral density (age 0-15)	ebi-a-GCST005345	MR Egger	6.95067	9	0.642256
			Inverse variance weighted	6.96673	10	0.728582
POI	Total body bone mineral density (age 30-45)	ebi-a-GCST005346	MR Egger	8.08291	9	0.525813
			Inverse variance weighted	9.19989	10	0.513245
POI	Total body bone mineral density (age over 60)	ebi-a-GCST005349	MR Egger	19.9362	12	0.0683032
			Inverse variance weighted	19.9365	13	0.0968048
POI	Total body bone mineral density (age 45-60)	ebi-a-GCST005350	MR Egger	10.3311	12	0.586937
			Inverse variance weighted	11.9814	13	0.529171
POI	Fractured bones in last 5 years	GCST90043629	MR Egger	13.5182	11	0.260807
			Inverse variance weighted	13.6258	12	0.325242
POI	Fractured of heel	GCST90043721	MR Egger	14.5991	11	0.201597
			Inverse variance weighted	15.4226	12	0.219133
POI	Fractured of ankle	GCST90044352	MR Egger	6.91124	11	0.806225
			Inverse variance weighted	7.8293	12	0.798324
POI	Fractured of leg	GCST90044353	MR Egger	3.148	2	0.207214
			Inverse variance weighted	3.56632	3	0.312262
POI	Fractured of hip	GCST90044354	MR Egger	6.48794	11	0.838908
			Inverse variance weighted	8.00912	12	0.784417
POI	Fractured of spine	GCST90044355	MR Egger	14.8377	11	0.190046
			Inverse variance weighted	15.3868	12	0.220959
POI	Fractured of wrist	GCST90044356	MR Egger	10.6458	11	0.473398
			Inverse variance weighted	12.1189	12	0.436179
POI	Fractured of arm	GCST90044357	MR Egger	11.6852	11	0.387765
			Inverse variance weighted	13.5967	12	0.327202
POI	Fracture of neck of femur	GCST90044632	MR Egger	6.89739	11	0.807331
			Inverse variance weighted	6.89739	12	0.864319
POI	Fracture of patella	GCST90044635	MR Egger	12.3532	11	0.337689
			Inverse variance weighted	16.5804	12	0.166074
POI	Fracture of pelvis	GCST90044638	MR Egger	7.35472	11	0.769673
			Inverse variance weighted	7.96544	12	0.787825
POI	Fracture of humerus	GCST90044639	MR Egger	4.8849	11	0.936612
			Inverse variance weighted	4.88776	12	0.961623
POI	Fracture of radius and ulna	GCST90044640	MR Egger	7.66341	11	0.7431
			Inverse variance weighted	7.82231	12	0.798857
POI	Fracture of clavicle or scapula	GCST90044641	MR Egger	8.96704	11	0.624935
			Inverse variance weighted	9.36772	12	0.671243
POI	Fracture of hand or wrist	GCST90044643	MR Egger	11.1393	11	0.431669
			Inverse variance weighted	12.0328	12	0.443048
POI	Fracture of ribs	GCST90044645	MR Egger	16.3738	11	0.127811
			Inverse variance weighted	16.3785	12	0.17451
POI	Skull and face fracture and other intercranial injury	GCST90044649	MR Egger	8.69412	11	0.650103
			Inverse variance weighted	8.80572	12	0.719429
POI	Malunion and nonunion of fracture	GCST90044575	MR Egger	6.69406	11	0.82329
			Inverse variance weighted	9.74108	12	0.638664
POI	Compression fracture	ebi-a-GCST90018828	MR Egger	1.44386	3	0.695287
			Inverse variance weighted	2.16671	4	0.705128

## Sheet: Supplementary Table S3a
Supplementary Table S3a: Reverse MR Analysis
Exposure	Outcome	ID	method	nsnp	b	se	pval	lo_ci	up_ci	or	or_lci95	or_uci95
Osteoporosis	POI	GCST90468145	Inverse variance weighted	11	-0.144915	0.148979	0.330693	-0.436914	0.147084	0.865096	0.646027	1.15845
			MR Egger	11	0.469121	0.704191	0.522001	-0.911093	1.84933	1.59859	0.402085	6.35559
			Weighted median	11	-0.243798	0.194269	0.209497	-0.624565	0.136969	0.783646	0.535494	1.14679
Heel bone mineral density	POI	GCST90029004	Inverse variance weighted	645	-0.233251	0.11281	0.038674	-0.454359	-0.0121427	0.791955	0.634855	0.987931
			MR Egger	645	-0.331687	0.201691	0.100556	-0.727002	0.0636285	0.717712	0.483356	1.0657
			Weighted median	645	-0.234653	0.189688	0.21607	-0.606441	0.137136	0.790845	0.545288	1.14698
Ultradistal forearm bone mineral density	POI	GCST90013422	Inverse variance weighted	33	-0.0985982	0.158962	0.535085	-0.410164	0.212968	0.906107	0.663542	1.23734
			MR Egger	33	-0.498207	0.336173	0.148436	-1.15711	0.160692	0.607619	0.314394	1.17432
			Weighted median	33	-0.0512631	0.21727	0.813477	-0.477112	0.374586	0.950029	0.620573	1.45439
Bone mineral density	POI	GCST90014022	Inverse variance weighted	543	-0.181114	0.116537	0.120151	-0.409526	0.0472975	0.83434	0.663965	1.04843
			MR Egger	543	-0.296476	0.214049	0.166597	-0.716012	0.12306	0.743433	0.488697	1.13095
			Weighted median	543	-0.191754	0.196902	0.330126	-0.577682	0.194173	0.82551	0.561198	1.21431
Total body bone mineral density	POI	ebi-a-GCST005348	Inverse variance weighted	127	-0.134313	0.132138	0.309411	-0.393303	0.124678	0.874317	0.674824	1.13278
			MR Egger	127	-0.326217	0.324958	0.317379	-0.963135	0.310701	0.721649	0.381694	1.36438
			Weighted median	127	-0.368639	0.19819	0.0628814	-0.757091	0.0198132	0.691675	0.469029	1.02001
Total body bone mineral density (age 15-30)	POI	ebi-a-GCST005344	Inverse variance weighted	10	0.0265871	0.161569	0.869294	-0.290087	0.343261	1.02694	0.748198	1.40954
			MR Egger	10	-1.04816	1.14346	0.386122	-3.28933	1.19302	0.350583	0.0372787	3.29702
			Weighted median	10	0.0986509	0.200179	0.622144	-0.293699	0.491001	1.10368	0.745501	1.63395
Total body bone mineral density (age 0-15)	POI	ebi-a-GCST005345	Inverse variance weighted	30	-0.301288	0.172654	0.0809777	-0.639689	0.0371134	0.739865	0.527456	1.03781
			MR Egger	30	-0.121127	0.481714	0.803302	-1.06529	0.823031	0.885921	0.344629	2.27739
			Weighted median	30	0.0145937	0.232065	0.949857	-0.440254	0.469441	1.0147	0.643873	1.5991
Total body bone mineral density (age 30-45)	POI	ebi-a-GCST005346	Inverse variance weighted	32	-0.0331887	0.118021	0.778549	-0.26451	0.198132	0.967356	0.767582	1.21912
			MR Egger	32	-0.280524	0.341777	0.418246	-0.950406	0.389359	0.755388	0.386584	1.47603
			Weighted median	32	-0.160963	0.16121	0.318051	-0.476934	0.155008	0.851323	0.620683	1.16767
Total body bone mineral density (age over 60)	POI	ebi-a-GCST005349	Inverse variance weighted	54	-0.153085	0.141475	0.279223	-0.430375	0.124205	0.858057	0.650265	1.13225
			MR Egger	54	-0.317003	0.383296	0.411992	-1.06826	0.434259	0.728329	0.343605	1.54382
			Weighted median	54	-0.352625	0.19625	0.0723656	-0.737276	0.0320259	0.702841	0.478415	1.03254
Total body bone mineral density (age 45-60)	POI	ebi-a-GCST005350	Inverse variance weighted	46	-0.0943061	0.144624	0.514352	-0.37777	0.189158	0.910004	0.685388	1.20823
			MR Egger	46	-0.566513	0.409072	0.173073	-1.36829	0.235267	0.567501	0.254541	1.26525
			Weighted median	46	-0.24301	0.194383	0.21124	-0.624	0.13798	0.784264	0.535797	1.14795
Fractured bones in last 5 years	POI	GCST90043629	Inverse variance weighted	44	0.328811	0.206837	0.111899	-0.0765885	0.734211	1.38932	0.926271	2.08384
			MR Egger	44	0.827633	0.60771	0.180494	-0.363479	2.01875	2.2879	0.695253	7.52887
			Weighted median	44	0.323512	0.306465	0.291139	-0.277158	0.924183	1.38197	0.757934	2.51981
Fractured of heel	POI	GCST90043721	Inverse variance weighted	5	-0.0015497	0.0437147	0.971721	-0.0872305	0.0841311	0.998452	0.916466	1.08777
			MR Egger	5	-0.0368599	0.122219	0.782663	-0.276409	0.20269	0.963811	0.758502	1.22469
			Weighted median	5	0.0107516	0.0522496	0.836967	-0.0916576	0.113161	1.01081	0.912417	1.11981
Fractured of ankle	POI	GCST90044352	Inverse variance weighted	16	0.0896207	0.155918	0.565431	-0.215979	0.39522	1.09376	0.805752	1.48471
			MR Egger	16	0.628496	0.314852	0.0657462	0.0113856	1.24561	1.87479	1.01145	3.47504
			Weighted median	16	0.112183	0.22426	0.616908	-0.327367	0.551733	1.11872	0.720819	1.73626
Fractured of leg	POI	GCST90044353	Inverse variance weighted	5	-0.0042776	0.109506	0.96884	-0.21891	0.210355	0.995731	0.803394	1.23412
			MR Egger	5	-0.0960225	0.151871	0.572114	-0.39369	0.201645	0.908444	0.674563	1.22341
			Weighted median	5	0.0015224	0.110976	0.989055	-0.215991	0.219035	1.00152	0.805743	1.24488
Fractured of hip	POI	GCST90044354	Inverse variance weighted	13	0.0414765	0.0571259	0.467806	-0.0704903	0.153443	1.04235	0.931937	1.16584
			MR Egger	13	0.0073026	0.0971658	0.94144	-0.183142	0.197747	1.00733	0.83265	1.21865
			Weighted median	13	0.0531878	0.0792276	0.502011	-0.102098	0.208474	1.05463	0.902941	1.2318
Fractured of spine	POI	GCST90044355	Inverse variance weighted	8	0.162024	0.0915977	0.0769157	-0.0175072	0.341556	1.17589	0.982645	1.40714
			MR Egger	8	0.023213	0.35177	0.94953	-0.666257	0.712683	1.02348	0.513628	2.03946
			Weighted median	8	0.147741	0.115731	0.201744	-0.0790904	0.374573	1.15921	0.923956	1.45437
Fractured of wrist	POI	GCST90044356	Inverse variance weighted	15	0.361886	0.165504	0.0287743	0.0374975	0.686275	1.43604	1.03821	1.9863
			MR Egger	15	0.731704	0.480453	0.151722	-0.209985	1.67339	2.07862	0.810597	5.33022
			Weighted median	15	0.299127	0.243593	0.219455	-0.178316	0.77657	1.34868	0.836678	2.174
Fractured of arm	POI	GCST90044357	Inverse variance weighted	13	-0.0557673	0.14652	0.703491	-0.342947	0.231412	0.945759	0.709676	1.26038
			MR Egger	13	-0.386646	0.418625	0.375506	-1.20715	0.433859	0.679331	0.299048	1.5432
			Weighted median	13	-0.118334	0.197721	0.549515	-0.505868	0.2692	0.8884	0.602982	1.30892
Fracture of neck of femur	POI	GCST90044632	Inverse variance weighted	22	-0.0972706	0.0721233	0.177443	-0.238632	0.044091	0.90731	0.787705	1.04508
			MR Egger	22	-0.316334	0.168397	0.0749696	-0.646392	0.0137245	0.728816	0.523933	1.01382
			Weighted median	22	-0.0653637	0.105805	0.536723	-0.272741	0.142013	0.936727	0.76129	1.15259
Fracture of patella	POI	GCST90044635	Inverse variance weighted	12	-0.0099683	0.0568215	0.86074	-0.121338	0.101402	0.990081	0.885734	1.10672
			MR Egger	12	-0.108907	0.0910424	0.259204	-0.28735	0.0695365	0.896814	0.750249	1.07201
			Weighted median	12	-0.0814925	0.0759162	0.283068	-0.230288	0.0673032	0.92174	0.794305	1.06962
Fracture of pelvis	POI	GCST90044638	Inverse variance weighted	9	0.162782	0.0554837	0.0033477	0.0540335	0.27153	1.17678	1.05552	1.31197
			MR Egger	9	0.135061	0.0982442	0.211599	-0.0574975	0.32762	1.14461	0.944124	1.38766
			Weighted median	9	0.159113	0.0670383	0.0176224	0.0277175	0.290508	1.17247	1.02811	1.33711
Fracture of humerus	POI	GCST90044639	Inverse variance weighted	10	-0.129991	0.108208	0.229632	-0.342077	0.0820964	0.878104	0.710293	1.08556
			MR Egger	10	0.117833	0.238002	0.633844	-0.34865	0.584316	1.12506	0.70564	1.79376
			Weighted median	10	-0.126782	0.151992	0.404204	-0.424687	0.171122	0.880926	0.653975	1.18664
Fracture of radius and ulna	POI	GCST90044640	Inverse variance weighted	9	0.133532	0.146383	0.361657	-0.153378	0.420442	1.14286	0.857805	1.52263
			MR Egger	9	-0.613349	0.381662	0.152079	-1.36141	0.134707	0.541534	0.2563	1.1442
			Weighted median	9	0.0374193	0.185802	0.840391	-0.326753	0.401591	1.03813	0.721262	1.4942
Fracture of clavicle or scapula	POI	GCST90044641	Inverse variance weighted	5	-0.0664423	0.124084	0.592331	-0.309648	0.176763	0.935717	0.733706	1.19335
			MR Egger	5	0.0609633	0.21509	0.79528	-0.360613	0.48254	1.06286	0.697248	1.62018
			Weighted median	5	-0.106712	0.159414	0.503239	-0.419164	0.205739	0.898784	0.657597	1.22843
Fracture of hand or wrist	POI	GCST90044643	Inverse variance weighted	6	-0.0767884	0.177036	0.664474	-0.423779	0.270202	0.926086	0.654569	1.31023
			MR Egger	6	0.35106	0.610982	0.596343	-0.846464	1.54858	1.42057	0.428929	4.7048
			Weighted median	6	-0.075454	0.215108	0.725759	-0.497066	0.346158	0.927322	0.608313	1.41363
Fracture of ribs	POI	GCST90044645	Inverse variance weighted	6	0.109995	0.107658	0.306919	-0.101015	0.321005	1.11627	0.90392	1.37851
			MR Egger	6	0.130814	0.198657	0.546196	-0.258553	0.520181	1.13976	0.772168	1.68233
			Weighted median	6	0.167812	0.136044	0.217384	-0.0988342	0.434459	1.18271	0.905893	1.54413
Skull and face fracture and other intercranial injury	POI	GCST90044649	Inverse variance weighted	10	-0.0487063	0.136112	0.720463	-0.315486	0.218073	0.952461	0.729434	1.24368
			MR Egger	10	0.0212012	0.245965	0.933429	-0.460891	0.503293	1.02143	0.630721	1.65416
			Weighted median	10	-0.121291	0.17022	0.476121	-0.454924	0.212341	0.885776	0.634496	1.23657
Malunion and nonunion of fracture	POI	GCST90044575	Inverse variance weighted	12	0.0540316	0.0990887	0.585558	-0.140182	0.248246	1.05552	0.8692	1.28177
			MR Egger	12	-0.214712	0.237573	0.387369	-0.680356	0.250931	0.806774	0.506437	1.28522
			Weighted median	12	0.10866	0.126162	0.389087	-0.138618	0.355938	1.11478	0.870561	1.42752
Compression fracture	POI	ebi-a-GCST90018828	Inverse variance weighted	14	0.0065842	0.117947	0.955482	-0.224591	0.23776	1.00661	0.798843	1.2684
			MR Egger	14	0.132144	0.227643	0.572323	-0.314035	0.578324	1.14127	0.730494	1.78305
			Weighted median	14	-0.0003008	0.16578	0.998552	-0.32523	0.324629	0.999699	0.722361	1.38352

## Sheet: Supplementary Table S3b
Supplementary Table S3b: Outlier and pleiotropy analysis（Reverse MR）
Exposure	Outcome	ID	Global.Test.Pvalue	egger_intercept	se	pval
Osteoporosis	POI	GCST90468145	0.974	-0.0841865	0.0943616	0.39553
Heel bone mineral density	POI	GCST90029004	0.146	0.0029089	0.0049396	0.556139
Ultradistal forearm bone mineral density	POI	GCST90013422	0.123	0.042495	0.0316114	0.188608
Bone mineral density	POI	GCST90014022	0.579	0.003444	0.0053601	0.520804
Total body bone mineral density	POI	ebi-a-GCST005344	0.911	0.136333	0.143594	0.370196
Total body bone mineral density (age 15-30)	POI	ebi-a-GCST005345	0.096	-0.0161588	0.0402463	0.691101
Total body bone mineral density (age 0-15)	POI	ebi-a-GCST005346	0.579	0.0274312	0.0355738	0.446674
Total body bone mineral density (age 30-45)	POI	ebi-a-GCST005348	0.176	0.0098378	0.0152123	0.519011
Total body bone mineral density (age over 60)	POI	ebi-a-GCST005349	0.164	0.0130756	0.0283826	0.646941
Total body bone mineral density (age 45-60)	POI	ebi-a-GCST005350	0.127	0.03961	0.0321242	0.224113
Fractured bones in last 5 years	POI	GCST90043629	0.974	-0.0254135	0.0291126	0.38766
Fractured of heel	POI	GCST90043721	0.564	0.0551881	0.177603	0.776338
Fractured of ankle	POI	GCST90044352	0.589	-0.0889549	0.0451539	0.0689439
Fractured of leg	POI	GCST90044353	0.62	0.068192	0.0760116	0.435762
Fractured of hip	POI	GCST90044354	0.981	0.0164763	0.037895	0.672123
Fractured of spine	POI	GCST90044355	0.8	0.06119	0.149716	0.696942
Fractured of wrist	POI	GCST90044356	0.746	-0.0405086	0.0494062	0.427046
Fractured of arm	POI	GCST90044357	0.733	0.0523038	0.0619887	0.416774
Fracture of neck of femur	POI	GCST90044632	0.846	0.0582642	0.0404727	0.165452
Fracture of patella	POI	GCST90044635	0.404	0.0682168	0.0498943	0.201499
Fracture of pelvis	POI	GCST90044638	0.319	0.0217147	0.0616555	0.735058
Fracture of humerus	POI	GCST90044639	0.47	-0.0766554	0.0655686	0.276021
Fracture of radius and ulna	POI	GCST90044640	0.729	0.130349	0.061515	0.0718305
Fracture of clavicle or scapula	POI	GCST90044641	0.58	-0.0887402	0.122371	0.520791
Fracture of hand or wrist	POI	GCST90044643	0.929	-0.0673044	0.0919897	0.504938
Fracture of ribs	POI	GCST90044645	0.762	-0.01032	0.0827615	0.90678
Skull and face fracture and other intercranial injury	POI	GCST90044649	0.234	-0.0214981	0.0614817	0.735615
Malunion and nonunion of fracture	POI	GCST90044575	0.231	0.0965665	0.0779638	0.243777
Compression fracture	POI	ebi-a-GCST90018828	0.837	-0.0286226	0.0443846	0.531142

## Sheet: Supplementary Table S3c
Supplementary Table S3c: Heterogeneity analysis（Reverse MR）
Exposure	Outcome	ID	method	Q	Q_df	Q_pval
Osteoporosis	POI	GCST90468145	MR Egger	2.76466	9	0.972899
			Inverse variance weighted	3.56063	10	0.965
Heel bone mineral density	POI	GCST90029004	MR Egger	678.655	643	0.159876
			Inverse variance weighted	679.021	644	0.164241
Ultradistal forearm bone mineral density	POI	GCST90013422	MR Egger	39.751	31	0.134752
			Inverse variance weighted	42.0683	32	0.109732
Bone mineral density	POI	GCST90014022	MR Egger	533.314	541	0.584919
			Inverse variance weighted	533.727	542	0.591849
Total body bone mineral density	POI	ebi-a-GCST005348	MR Egger	139.896	125	0.171352
			Inverse variance weighted	140.364	126	0.180309
Total body bone mineral density (age 15-30)	POI	ebi-a-GCST005344	MR Egger	3.01332	8	0.933519
			Inverse variance weighted	3.91474	9	0.916934
Total body bone mineral density (age 0-15)	POI	ebi-a-GCST005345	MR Egger	40.247	28	0.0628508
			Inverse variance weighted	40.4787	29	0.0764095
Total body bone mineral density (age 30-45)	POI	ebi-a-GCST005346	MR Egger	28.4582	30	0.546169
			Inverse variance weighted	29.0528	31	0.566482
Total body bone mineral density (age over 60)	POI	ebi-a-GCST005349	MR Egger	63.3105	52	0.135258
			Inverse variance weighted	63.5689	53	0.15172
Total body bone mineral density (age 45-60)	POI	ebi-a-GCST005350	MR Egger	54.9558	44	0.124505
			Inverse variance weighted	56.8547	45	0.110651
Fractured bones in last 5 years	POI	GCST90043629	MR Egger	26.1654	42	0.973495
			Inverse variance weighted	26.9274	43	0.973743
Fractured of heel	POI	GCST90043721	MR Egger	3.17914	3	0.364821
			Inverse variance weighted	3.28147	4	0.511874
Fractured of ankle	POI	GCST90044352	MR Egger	8.76407	14	0.845861
			Inverse variance weighted	12.6451	15	0.629687
Fractured of leg	POI	GCST90044353	MR Egger	3.86142	3	0.276822
			Inverse variance weighted	4.89736	4	0.297992
Fractured of hip	POI	GCST90044354	MR Egger	3.77514	11	0.976039
			Inverse variance weighted	3.96418	12	0.984074
Fractured of spine	POI	GCST90044355	MR Egger	3.62196	6	0.727679
			Inverse variance weighted	3.789	7	0.803734
Fractured of wrist	POI	GCST90044356	MR Egger	9.83694	13	0.707211
			Inverse variance weighted	10.5092	14	0.72409
Fractured of arm	POI	GCST90044357	MR Egger	8.00587	11	0.712778
			Inverse variance weighted	8.71781	12	0.726826
Fracture of neck of femur	POI	GCST90044632	MR Egger	12.67	20	0.89109
			Inverse variance weighted	14.7424	21	0.835651
Fracture of patella	POI	GCST90044635	MR Egger	9.767	10	0.461167
			Inverse variance weighted	11.6363	11	0.391592
Fracture of pelvis	POI	GCST90044638	MR Egger	11.1089	7	0.133937
			Inverse variance weighted	11.3058	8	0.184967
Fracture of humerus	POI	GCST90044639	MR Egger	7.15142	8	0.520388
			Inverse variance weighted	8.51818	9	0.482883
Fracture of radius and ulna	POI	GCST90044640	MR Egger	0.813139	7	0.997308
			Inverse variance weighted	5.30318	8	0.724735
Fracture of clavicle or scapula	POI	GCST90044641	MR Egger	2.83936	3	0.417061
			Inverse variance weighted	3.36524	4	0.498662
Fracture of hand or wrist	POI	GCST90044643	MR Egger	0.897062	4	0.924982
			Inverse variance weighted	1.43238	5	0.920739
Fracture of ribs	POI	GCST90044645	MR Egger	2.84886	4	0.583428
			Inverse variance weighted	2.86441	5	0.72088
Skull and face fracture and other intercranial injury	POI	GCST90044649	MR Egger	12.0765	8	0.147823
			Inverse variance weighted	12.2611	9	0.198989
Malunion and nonunion of fracture	POI	GCST90044575	MR Egger	12.4364	10	0.256908
			Inverse variance weighted	14.3444	11	0.21452
Compression fracture	POI	ebi-a-GCST90018828	MR Egger	7.4092	12	0.829431
			Inverse variance weighted	7.82507	13	0.854807
